# Supplementary material for: Preparation of Multifunctional N-Doped Carbon Quantum Dots from Citrus clementina Peel: Investigating Targeted Pharmacological Activities and the Potential Application for Fe3+ Sensing
Source: Pharmaceuticals (Basel). 2021 Aug 27;14(9):857. doi: 10.3390/ph14090857 (PMC8465261; doi:10.3390/ph14090857)
Supplement: Supplementary file 1 [file pharmaceuticals-14-00857-s001.zip › pharmaceuticals-1351758-supplementary.pdf]

## Supplementary Material for

# Preparation of Multifunctional N-doped Carbon Quantum Dots from *Citrus clementina* Peel: Investigating Targeted Pharmacological Activities and the Potential Application for Fe<sup>3+</sup> Sensing

Silvija Šafranko <sup>1</sup>, Anamarija Stanković <sup>2</sup>, Sugato Hajra <sup>3</sup>, Hoe-Joon Kim <sup>3</sup>, Ivica Strelec <sup>1</sup>, Maja Dutour-Sikirić <sup>4</sup>, Igor Weber <sup>5</sup>, Maja Herak Bosnar <sup>6</sup>, Petra Grbčić <sup>7</sup>, Sandra Kraljević Pavelić <sup>8</sup>, Aleksandar Széchenyi <sup>9</sup>, Yogendra Kumar Mishra <sup>10</sup>, Igor Jerković <sup>11,\*</sup> and Stela Jokić <sup>1,\*</sup>

<sup>1</sup> Faculty of Food Technology Osijek, University of Osijek, Franje Kuhača 18, 31000 Osijek, Croatia; silvija.safranko@ptfos.hr (S.Š.); ivica.strelec@ptfos.hr (I.S.)

<sup>2</sup> Department of Chemistry, University of Osijek, Ulica cara Hadrijana 8/A, 31000 Osijek, Croatia; astankovic@kemija.unios.hr

<sup>3</sup> Department of Robotics Engineering, Daegu Gyeongbuk Institute of Science & Technology (DGIST), Daegu 42988, Korea; sugatohajra@dgist.ac.kr (S.H.); joonkim@dgist.ac.kr (H.-J.K.)

<sup>4</sup> Division of Physical Chemistry, Ruđer Bošković Institute, 10000 Zagreb, Croatia; maja.dutour.sikiric@irb.hr

<sup>5</sup> Division of Molecular Biology, Ruđer Bošković Institute, 10000 Zagreb, Croatia; iweber@irb.hr

<sup>6</sup> Division of Molecular Medicine, Ruđer Bošković Institute, 10000 Zagreb, Croatia; mherak@irb.hr

<sup>7</sup> Department of Biotechnology, University of Rijeka, Radmile Matejčić 2, 51000 Rijeka, Croatia; petra.grbcic@biotech.uniri.hr

<sup>8</sup> Faculty of Health Studies, University of Rijeka, Viktora Cara Emina 5, 51000 Rijeka, Croatia; sandrakp@uniri.hr

<sup>9</sup> Institute of Pharmaceutical Technology and Biopharmacy, Faculty of Pharmacy, University of Pécs, H-7624 Pécs, Hungary; szealex@gamma.ttk.pte.hu

<sup>10</sup> Mads Clausen Institute, NanoSYD, University of Southern Denmark, Alsion 2, 6400 Sønderborg, Denmark; mishra@mci.sdu.dk

<sup>11</sup> Department of Organic Chemistry, Faculty of Chemistry and Technology, University of Split, Ruđera Boškovića 35, 21000 Split, Croatia

\* Correspondence: igor@ktf-split.hr (I.J.); sjokic@ptfos.hr (S.J.); Tel.: +385-21-329-461 (I.J.); +385-31-224-333 (S.J.)

## Content of listed material

**Figure S1.** UV-HPLC chromatograms of Pure CQD retentate before dialysis (a), after (b) 24 hours and (c) 48 hours.

**Figure S2.** EDS mapping of nitrogen for a) CQD@Gly and b) CQD@Arg

**Figure S3.** XRD patterns of a) Pure CQD and b) CQD@Gly

**Figure S4.** Integrated fluorescence intensity vs. absorbance of CQDs samples (recorded at  $\lambda_{\text{EX}}=360$  nm); calculated quantum yield (QY) of synthesized samples of CQDs using quinine sulfate as reference standard ( $\phi_{\text{QS}} = 54 \%$ )

**Figure S5.** Optical characterization of Pure CQD: a) Fluorescence emission spectra of Pure CQD at different excitation wavelengths ranging from 320 nm to 440 nm (increments of 20 nm); b) normalized fluorescence emission spectra, c) stability of Pure CQD in the high ionic medium of NaCl (0-1.0 mol dm<sup>-3</sup>;  $\lambda_{\text{EX}} = 360$  nm,  $\lambda_{\text{EM}} = 445$  nm); d) effect of pH on fluorescence intensity ( $\lambda_{\text{EX}} = 360$  nm,  $\lambda_{\text{EM}} = 445$  nm)

**Figure S6.** Optical characterization of CQD@Gly: a) Fluorescence emission spectra of CQD@Gly at different excitation wavelengths ranging from 320 nm to 440 nm (increments of 20 nm); b) normalized fluorescence emission spectra, c) stability of CQD@Gly in the high ionic medium of NaCl (0-1.0 mol dm<sup>-3</sup>;  $\lambda_{\text{EX}} = 360$  nm,  $\lambda_{\text{EM}} = 430$  nm); d) effect of pH on fluorescence intensity ( $\lambda_{\text{EX}} = 360$  nm,  $\lambda_{\text{EM}} = 430$  nm)

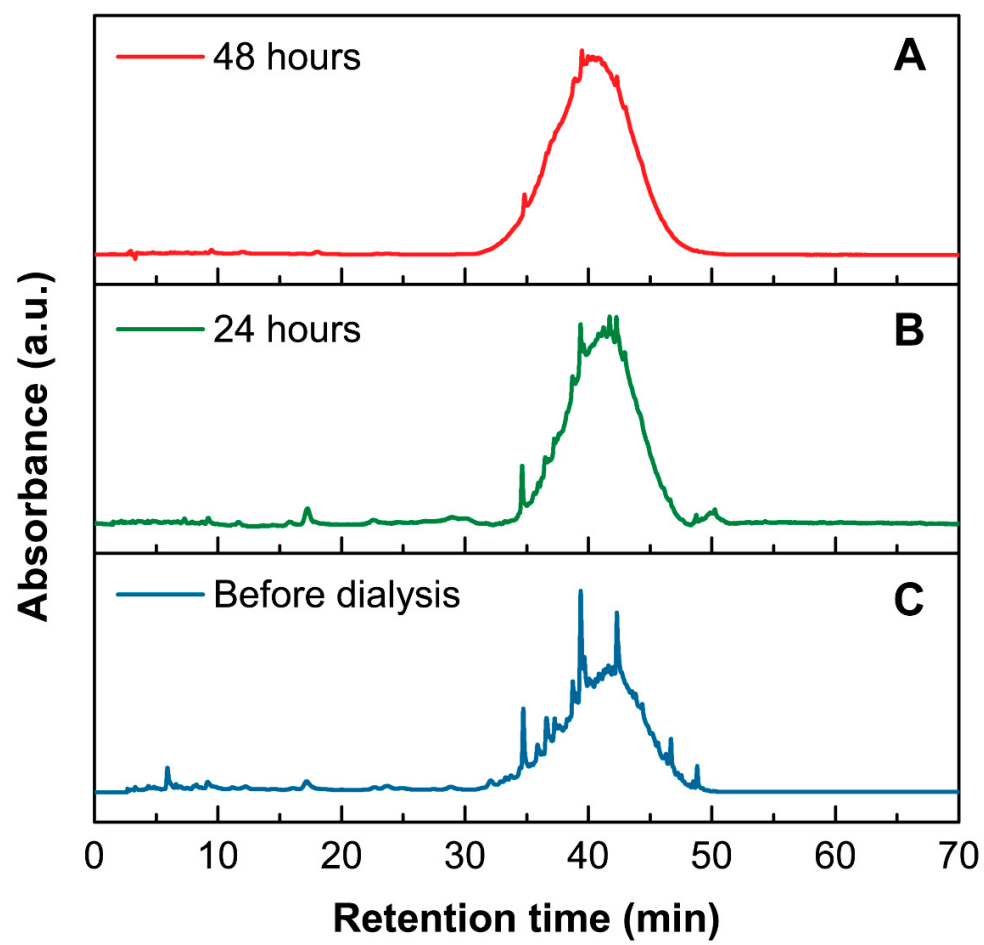

Figure S1.

A) CQD@Gly

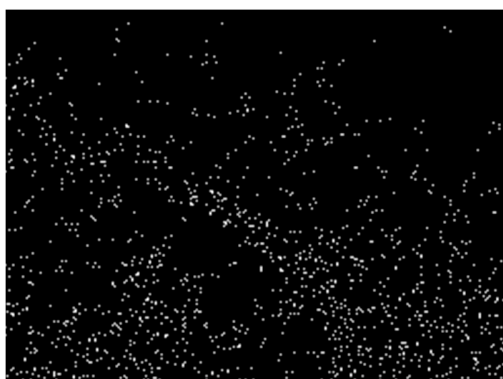

N Ka1\_2

B) CQD@Arg

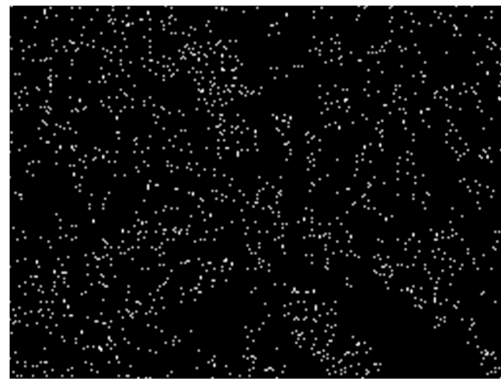

N Ka1\_2

Figure S2.

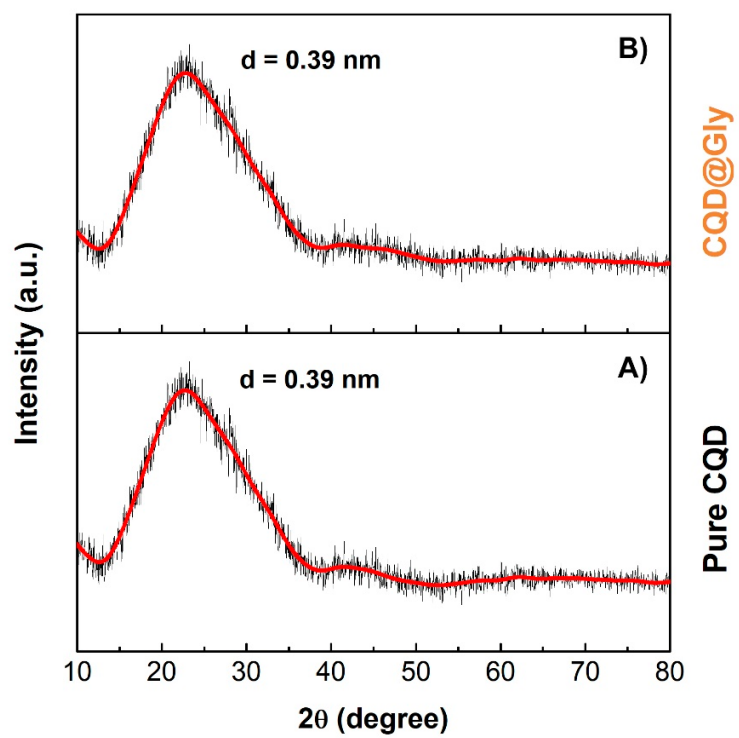

Figure S3.

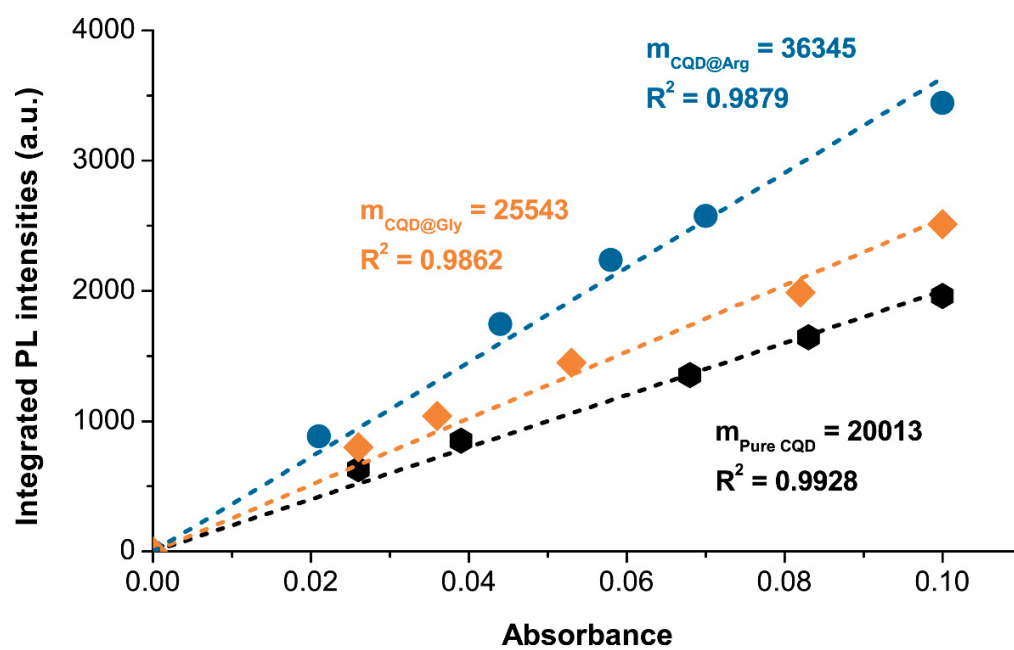

Figure S4.

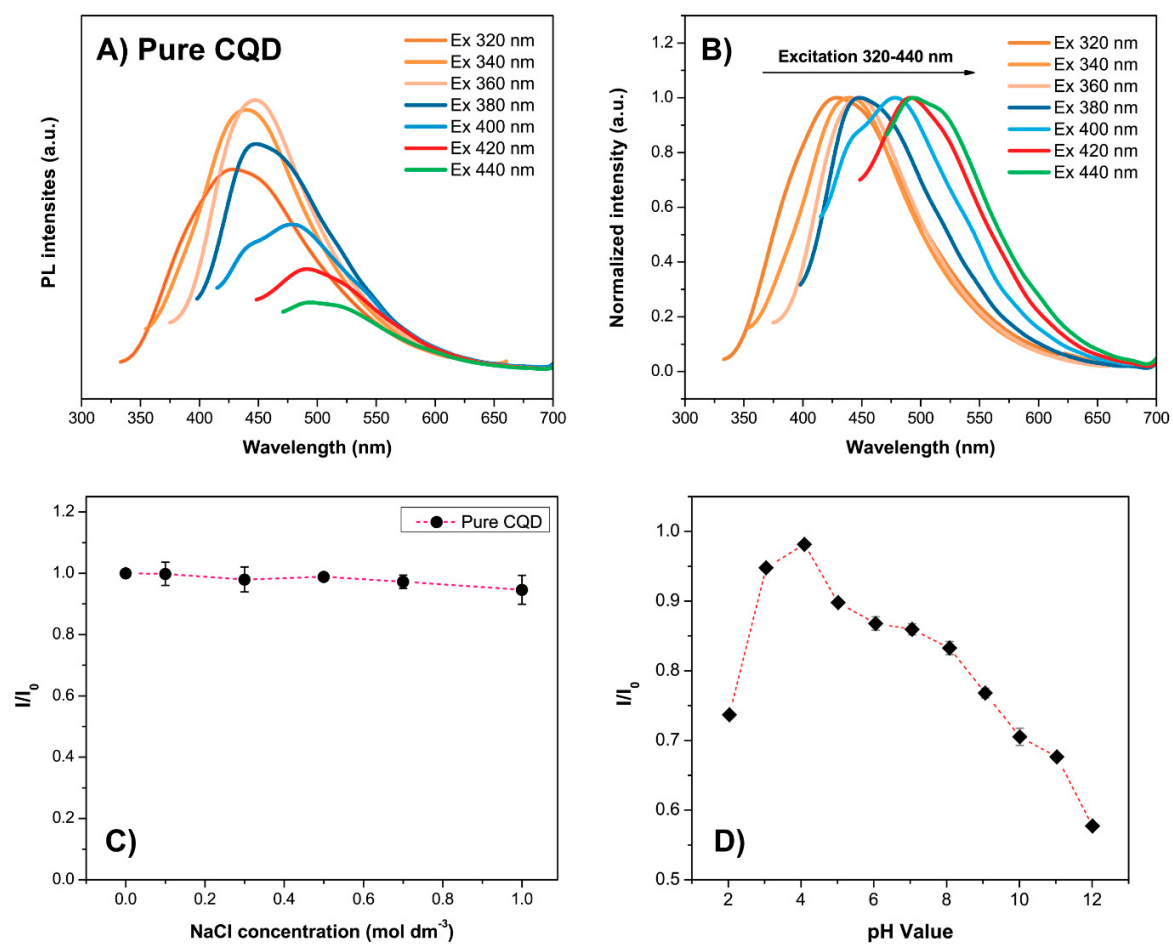

Figure S5.

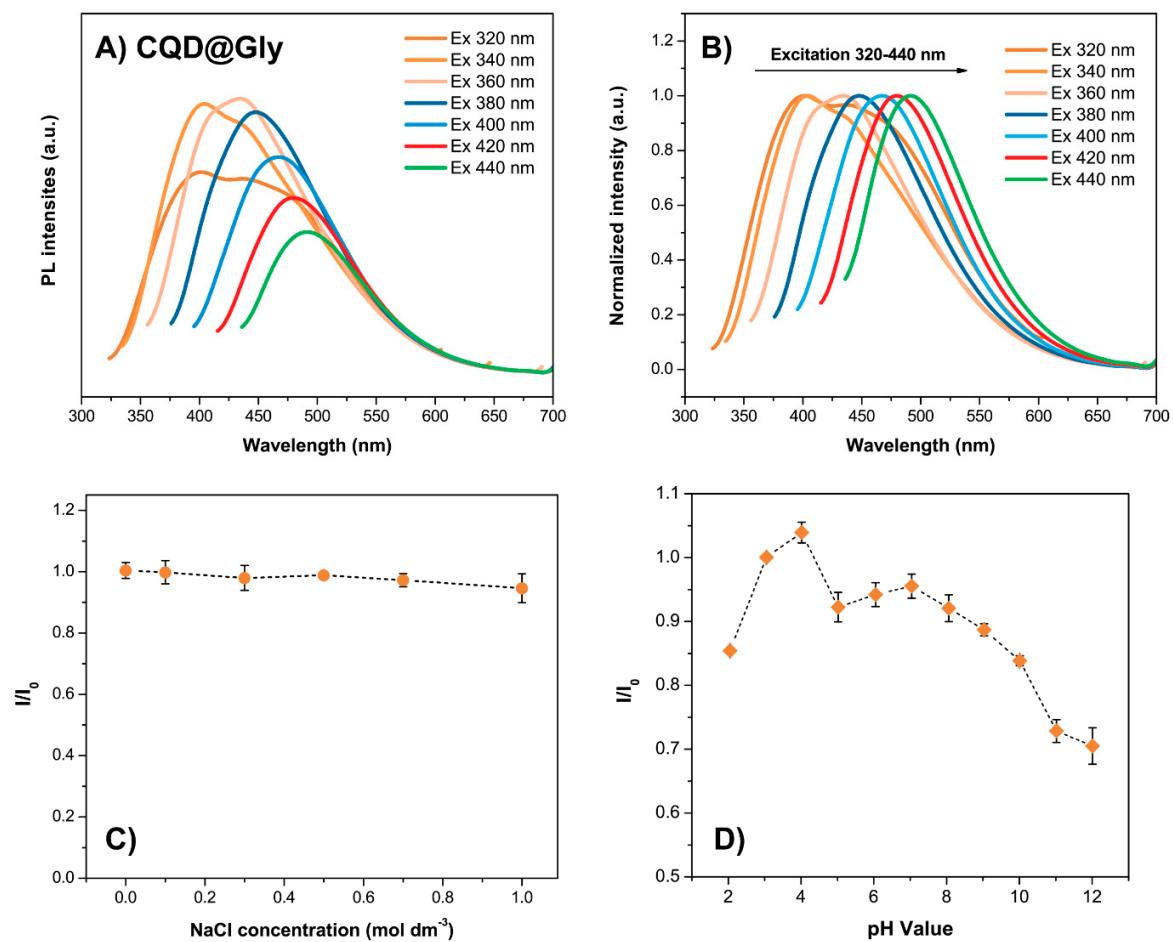

**Figure S6.**

## Table content

**Table S1.** Photographs of prepared CQDs with calculated quantum yields under a) daylight and b) under UV light (365 nm). The photograph (c) shows text written using CQD@Arg under UV light (365 nm)

| Sample                   | A                                                                                    | B                                                                                   |
|--------------------------|--------------------------------------------------------------------------------------|-------------------------------------------------------------------------------------|
| Pure CQD<br>(QY: 1.17 %) | 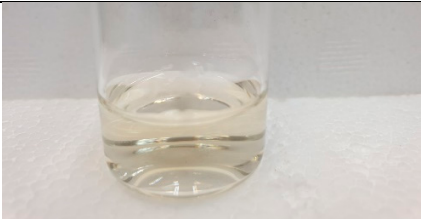    | 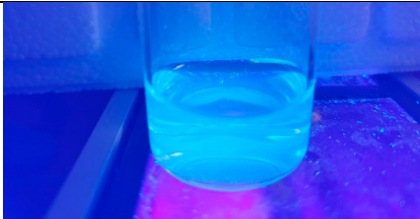  |
| CQD@Gly<br>(QY: 1.53 %)  | 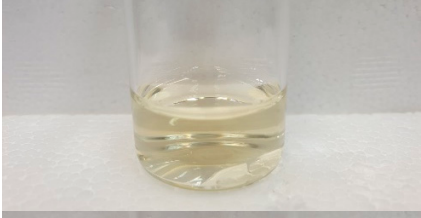    | 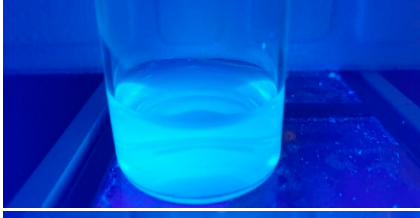  |
| CQD@Arg<br>(QY: 2.17 %)  | 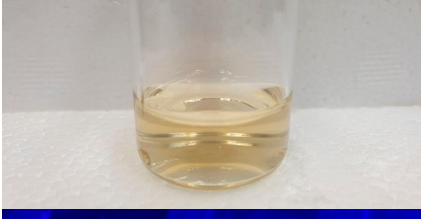   | 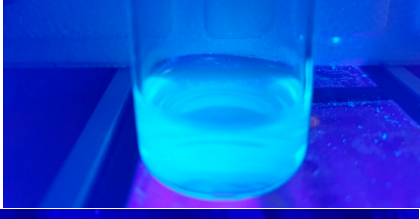 |
| Fluorescent Ink<br>(C)   | 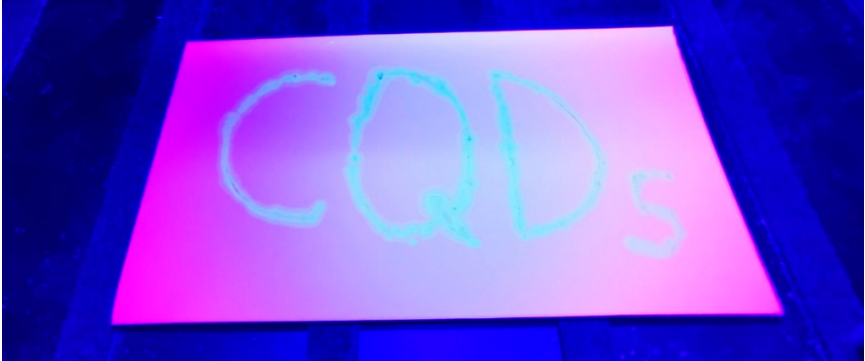 |                                                                                     |

**Table S2.** Elemental analysis of as-prepared CQDs

| Sample   | Weight% |       |       | Atomic% |       |       |
|----------|---------|-------|-------|---------|-------|-------|
|          | C (%)   | O (%) | N (%) | C (%)   | O (%) | N (%) |
| Pure CQD | 52.20   | 39.03 | -     | 61.89   | 34.74 | -     |
| CQD@Gly  | 59.81   | 31.80 | 3.16  | 67.74   | 27.04 | 3.07  |
| CQD@Arg  | 58.76   | 28.64 | 4.94  | 67.45   | 24.68 | 4.87  |
